# Supplementary material for: Chloroquine enhances TRAIL-mediated apoptosis through up-regulation of DR5 by stabilization of mRNA and protein in cancer cells
Source: PubMed Central journal article supplement (PMC4786792; doi:10.1038/srep22921), 2016-03-11
Supplement: srep22921-s1.pdf [file srep22921-s1.pdf]

<Supplementary information>

**Chloroquine enhances TRAIL-mediated apoptosis through up-regulation of DR5 by stabilization of mRNA and protein in cancer cells.**

Eun Jung Park<sup>1¶</sup>, Kyoung-jin Min<sup>1¶</sup>, Kyeong Sook Choi<sup>2</sup>, Peter Kubatka<sup>3</sup>, Peter Kruzliak<sup>4,5</sup>, Dong Eun Kim<sup>6\*</sup>, Taeg Kyu Kwon<sup>1\*</sup>

<sup>1</sup>Department of Immunology, Keimyung University, 2800 Dalgubeoldaero, Dalseo-Gu, Daegu 704-701, South Korea. <sup>2</sup>Department of Biochemistry & Molecular Biology, Ajou University School of Medicine, Suwon, South Korea. <sup>3</sup>Department of Medical Biology, Jessenius Faculty of Medicine, Comenius University in Bratislava, Martin, Slovakia. <sup>4</sup>2<sup>nd</sup> Department of Internal Medicine, Faculty of Medicine, Masaryk University, Brno, Czech Republic. <sup>5</sup>Department of Pharmacology and Toxicology, Faculty of Pharmacy, Comenius University, Bratislava, Slovak Republic. <sup>6</sup>Department of Otolaryngology, School of Medicine, Keimyung University, 2800 Dalgubeoldaero, Dalseo-Gu, Daegu 704-701, South Korea.

¶ These authors contributed equally to this work.

\* Corresponding author: Taeg Kyu Kwon, Ph.D.

Address: Keimyung University, 2800 Dalgubeoldaero, Dalseo-Gu, Daegu 704-701, South Korea

Tel: 82-53-5803882

E-mail: kwontk@dsmc.or.kr

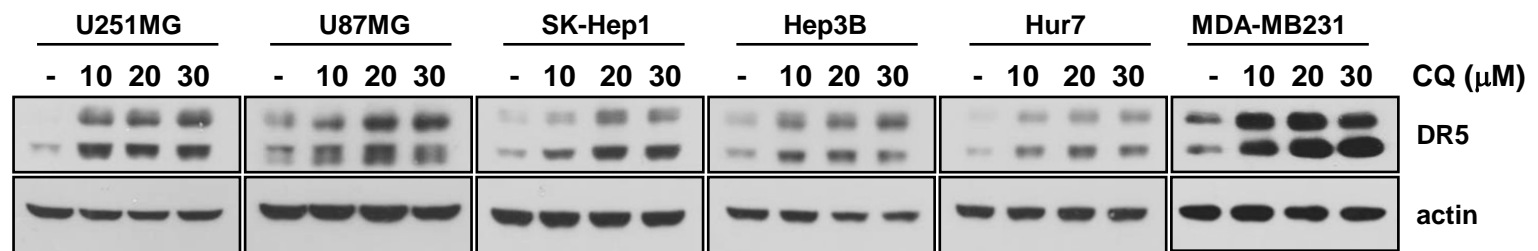

**Figure S1. The effect of CQ on DR5 expression in other cancer cells.** Human glioma (U251MG and U87MG), human hepatoma (SK-Hep1, Hep3B, and Hur7) and human breast cancer (MDA-MB231) cells were treated with indicated concentrations of CQ for 12 h. The protein level of DR5 and actin were determined by Western blotting. The level of actin was used as a loading control.

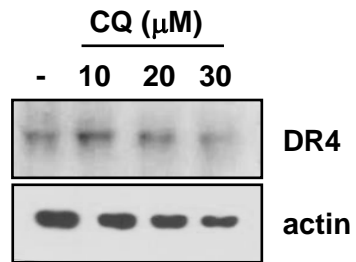

**Figure S2. The effect of CQ on DR4 expression in Caki cells.** Caki cells were treated with indicated concentrations of CQ. The protein level of DR4 was determined by Western blotting. The level of actin was used as a loading control.
